# Supplementary material for: Hidden Complexities in Assessment of Glycemic Outcomes: Are quality rankings aligned with treatment?
Source: PubMed Central journal article supplement — Diabetes Care. 2010 Jul 9;33(10):2133–9. doi: 10.2337/dc09-1665 (PMC2945148; doi:10.2337/dc09-1665), 2010-07-09

Appendix

Figure 1: Flow chart of patients who met inclusion/exclusion criteria for the study population

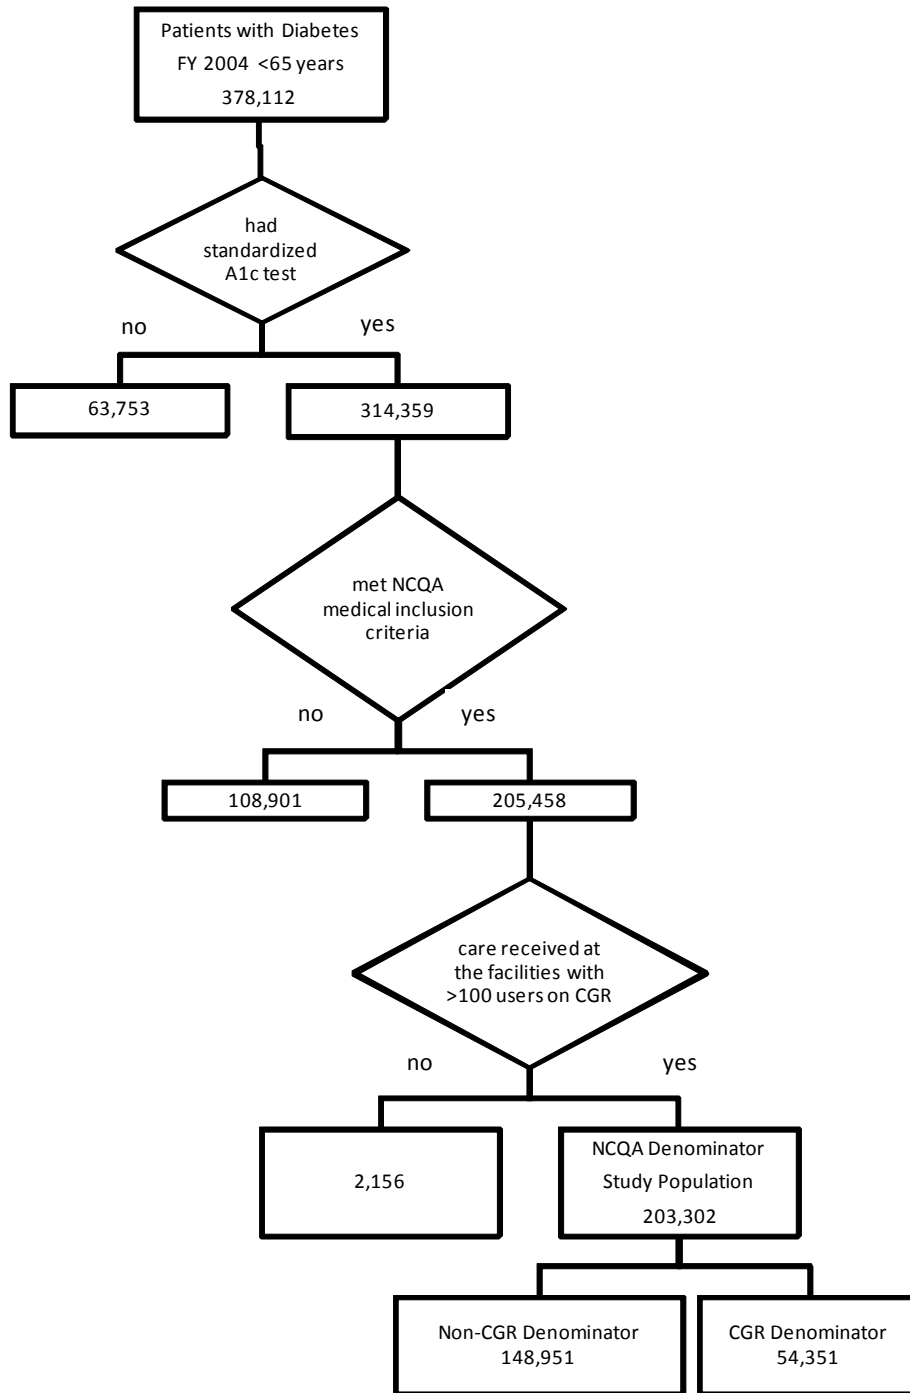

Supplement: supp_dc09-1665_dc091665onlineappendix.pdf [file supp_dc09-1665_dc091665onlineappendix.pdf]
